# Supplementary material for: A geostatistical synthesis study of factors affecting gross primary productivity in various ecosystems of North America
Source: Copernicus journal article supplement (doi:10.5194/bg-7-2655-2010), 2010-09-09
Supplement: Supplementary file 1 [file Supplementary Material.doc]

**Supplementary Material**

**Table A-1** Regression coefficients for standardized covariates in the best GR model (; MgC/day/km2 ) and their standard deviations () at the daily scale. Each covariate was standardized to a mean of zero and a standard deviation of one, in order to make the magnitude of the regression coefficients comparable across covariates.

| Flux Sites |  | Constant | LAI | FPAR | EVI | NDVI | Global  radiation | Air  temp | Vapor pressure | Soil  temp | Precipi-tation | Soil water |
| --- | --- | --- | --- | --- | --- | --- | --- | --- | --- | --- | --- | --- |
|  |  | deficit |  | content |
| Kennedy Space Center |  | 5.30 |  |  | 0.45 |  | 0.85 | 0.24 |  |  | -0.11 |  |
|  |  | 0.12 |  |  | 0.11 |  | 0.03 | 0.04 |  |  | 0.02 |  |
| Vaira Ranch |  | 4.40 |  |  |  | 1.90 | 1.60 | 0.54 | -0.47 |  | -0.16 |  |
|  |  | 0.40 |  |  |  | 0.23 | 0.04 | 0.06 | 0.06 |  | 0.02 |  |
| Tonzi Ranch |  | 3.49 |  |  | 1.26 |  | 1.11 | 0.60 | -0.87 |  | -0.10 |  |
|  |  | 0.13 |  |  | 0.12 |  | 0.05 | 0.10 | 0.09 |  | 0.02 |  |
| Blodgett Forest |  | 3.45 |  |  |  |  | 1.36 | 1.31 | -1.09 | -0.66 | -0.20 |  |
|  |  | 0.13 |  |  |  |  | 0.04 | 0.08 | 0.06 | 0.10 | 0.02 |  |
| Morgan Monroe |  | 10.32 |  |  | 1.40 |  | 1.20 | 0.83 | -0.35 |  | -0.42 |  |
|  |  | 0.20 |  |  | 0.16 |  | 0.07 | 0.09 | 0.08 |  | 0.05 |  |
| Harvard Forest |  | 8.70 |  |  |  | 1.89 | 1.95 | 0.59 | -0.65 |  | -0.34 |  |
|  |  | 0.48 |  |  |  | 0.27 | 0.09 | 0.09 | 0.10 |  | 0.05 |  |

**Table A-2** Regression coefficients for standardized covariates in the best GR model (; MgC/day/km2 ) and their standard deviations () at the 8-day scale. Each covariate was standardized to a mean of zero and a standard deviation of one, in order to make the magnitude of the regression coefficients comparable across covariates.

| Flux Sites |  | Constant | LAI | FPAR | EVI | NDVI | Global  radiation | Air  temp | Vapor pressure | Soil  temp | Precipi-  tation | Soil water |
| --- | --- | --- | --- | --- | --- | --- | --- | --- | --- | --- | --- | --- |
|  |  | deficit |  | content |
| Kennedy Space Center |  | 5.22 |  |  | 0.56 |  | 0.53 | 0.24 |  |  |  |  |
|  |  | 0.18 |  |  | 0.14 |  | 0.06 | 0.08 |  |  |  |  |
| Vaira Ranch |  | 4.45 | 1.16 | -0.56 |  | 1.73 | 1.11 | 0.48 | -0.79 |  |  |  |
|  |  | 0.33 | 0.28 | 0.15 |  | 0.24 | 0.19 | 0.14 | 0.16 |  |  |  |
| Tonzi Ranch |  | 3.41 | 0.46 |  | 1.03 |  | 0.53 |  |  |  | -0.19 |  |
|  |  | 0.20 | 0.18 |  | 0.20 |  | 0.15 |  |  |  | 0.06 |  |
| Blodgett Forest |  | 3.37 |  |  |  |  | 1.20 | 1.02 | -0.96 |  |  |  |
|  |  | 0.21 |  |  |  |  | 0.13 | 0.16 | 0.13 |  |  |  |
| Morgan Monroe |  | 10.08 |  |  | 1.77 |  |  | 0.79 |  |  | -0.28 |  |
|  |  | 0.25 |  |  | 0.20 |  |  | 0.15 |  |  | 0.09 |  |
| Harvard Forest |  | 8.40 |  |  |  | 1.84 | 0.47 | 0.50 |  |  |  |  |
|  |  | 0.56 |  |  |  | 0.26 | 0.09 | 0.16 |  |  |  |  |

**Table A-3** Regression coefficients for standardized covariates in the best GR model (; MgC/day/km2 ) and their standard deviations () at the monthly scale. Each covariate was standardized to a mean of zero and a standard deviation of one, in order to make the magnitude of the regression coefficients comparable across covariates.

| Flux Sites |  | Constant | LAI | FPAR | EVI | NDVI | Global  radiation | Air  temp | Vapor pressure | Soil  temp | Precipi-tation | Soil water |
| --- | --- | --- | --- | --- | --- | --- | --- | --- | --- | --- | --- | --- |
|  |  | deficit |  | content |
| Kennedy Space Center |  | 5.14 |  |  | 0.69 |  |  |  | 0.35 | 0.36 |  |  |
|  |  | 0.16 |  |  | 0.15 |  |  |  | 0.10 | 0.14 |  |  |
| Vaira Ranch |  | 4.38 | 2.82 |  |  |  |  |  | -1.10 |  |  |  |
|  |  | 0.22 | 0.19 |  |  |  |  |  | 0.17 |  |  |  |
| Tonzi Ranch |  | 3.30 | 1.29 |  |  |  | 1.17 | -0.98 |  |  |  |  |
|  |  | 0.14 | 0.12 |  |  |  | 0.27 | 0.26 |  |  |  |  |
| Blodgett Forest |  | 3.18 |  |  |  |  | 1.30 |  |  |  |  |  |
|  |  | 0.24 |  |  |  |  | 0.13 |  |  |  |  |  |
| Morgan Monroe |  | 9.69 |  |  | 1.05 |  | 1.08 |  |  | 0.91 |  |  |
|  |  | 0.18 |  |  | 0.23 |  | 0.22 |  |  | 0.17 |  |  |
| Harvard Forest |  | 8.48 | 3.53 | -2.35 |  |  |  | 1.59 |  |  |  |  |
|  |  | 0.34 | 0.70 | 0.61 |  |  |  | 0.34 |  |  |  |  |
